# Supplementary material for: Hepatitis E virus infects brain microvascular endothelial cells, crosses the blood–brain barrier, and invades the central nervous system
Source: PubMed Central journal article supplement — Proc Natl Acad Sci U S A. 2022 Jun 7;119(24):e2201862119. doi: 10.1073/pnas.2201862119 (PMC9214495; doi:10.1073/pnas.2201862119), 2022-06-07
Supplement: pnas.2201862119.sapp.pdf [file pnas.2201862119.sapp.pdf]

1  
2  
3  
4  
5  
6  
7  
8  
9  
10  
11  
12  
13  
14  
15  
16  
17  
18  
19

**Supplementary Information for**

**Hepatitis E virus infects brain microvascular endothelial cells, crosses blood-brain barrier, and  
invades the central nervous system**

Debin Tian<sup>1</sup>, Wen Li<sup>1</sup>, C. Lynn Heffron<sup>1</sup>, Bo Wang<sup>1</sup>, Hassan M. Mahsoub<sup>1</sup>, Harini Sooryanarain<sup>1,2</sup>,  
Anna M. Hassebroek<sup>1</sup>, Sherrie Clark-Deener<sup>3</sup>, Tanya LeRoith<sup>1,2</sup>, and Xiang-Jin Meng<sup>1,2\*</sup>

**\*Corresponding author:**

X.J. Meng, M.D., Ph.D., University Distinguished Professor, College of Veterinary Medicine, Virginia  
Polytechnic Institute and State University, 1981 Kraft Drive, Blacksburg, VA.

**Email:** xjmeng@vt.edu

**This PDF file includes:**

- Figure S1
- Tables S1, S2

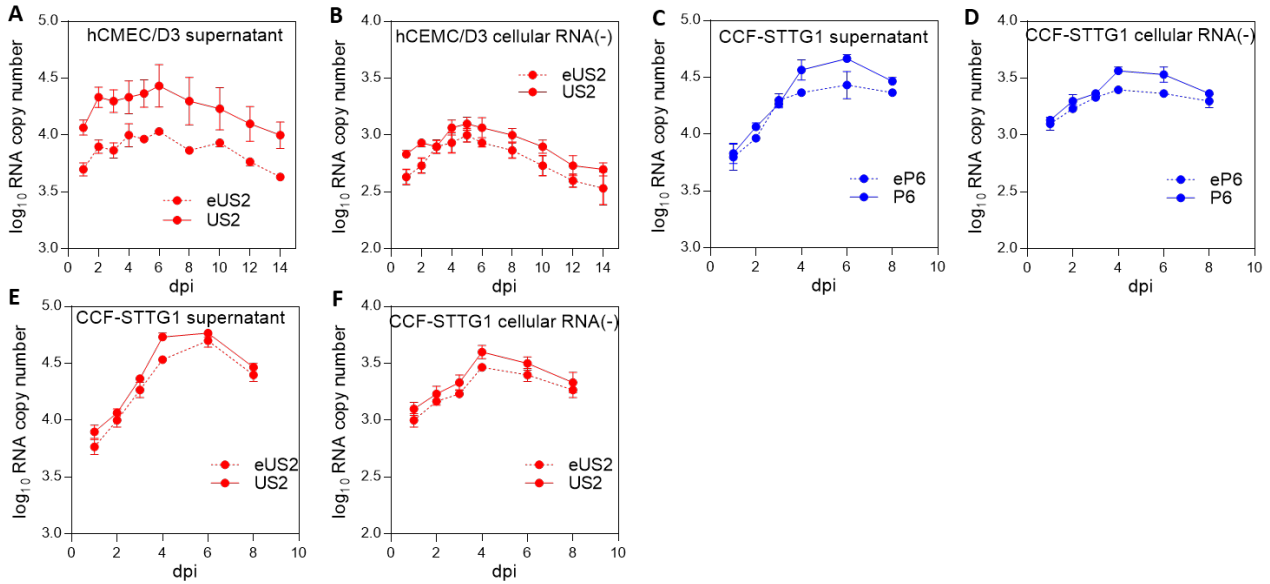

20

21 **Figure S1.** HEV infects brain microvascular endothelial cells lining the blood-brain barrier (BBB) as

22 well as the astrocytes. The brain microvascular endothelial cells (hCMEC/D3) grown in a 12-well plate

23 were inoculated with  $1.0 \times 10^6$  genomic RNA copies of quasi-enveloped eUS2 virus stock or with non-

24 enveloped US2 virus stock and incubated for 2 h. After washing the cells twice, culture medium was

25 added and the infected cells were cultured for 14 days. Culture supernatants and monolayer cells were

26 collected at indicated different time points and subjected to quantification of HEV RNAs (**A**) and

27 negative-stranded RNAs (**B**) by qRT-PCR. The astrocytes (CCF-STTG1) grown in a 12-well plate were

28 inoculated with  $1.0 \times 10^6$  genomic RNA copies of HEV quasi-enveloped virus eP6 or non-enveloped

29 virus P6 (**C, D**), and with HEV quasi-enveloped virus eUS2 or non-enveloped US2 (**E, F**), respectively,

30 and incubated for 2 h. After washing twice, culture medium was added and the infected cells were

31 cultured for 8 days. Culture supernatants and monolayer cells were collected at indicated different time

32 points and subjected to quantification of HEV RNA (**C, E**) and negative-strand HEV RNA (**D, F**) by

33 qRT-PCR.

34

35

**Table S1.** Oligonucleotide primers used in this study

| <b>Primer ID</b>  | <b>Sequence (5'-3')</b>               | <b>Used for</b>             |
|-------------------|---------------------------------------|-----------------------------|
| JVHEV F           | GGTGGTTTCTGGGGTGAC                    | qRT-PCR, HEV                |
| JVHEV R           | AGGGGTTGGTTGGATGAA                    | qRT-PCR, HEV                |
| JVHEV P           | FAM-TGATTCTCAGCCCTTCGC-BHQ)           | qRT-PCR probe, HEV          |
| Tag-FP            | CGGTCATGGTGGCGAATAAGGTGGTTTCTGGGGTGAC | cDNA synthesis, HEV RNA (-) |
| Tag               | CGGTCATGGTGGCGAATAA                   | qRT-PCR, HEV RNA (-)        |
| F-P6-5487         | TGACAGGGTTGATTCTCAGCCCTTC             | Nested PCR, HEV             |
| R-P6-6876         | ACCAGTGGCCACATTGACAAAGGT              | Nested PCR, HEV             |
| F-P6-5713         | ACAGCCCCTGTACCTGATGTTGATTC            | Nested PCR, HEV             |
| R-P6-6623         | TCTTGCTGCGCATTCTCCACAGATG             | Nested PCR, HEV             |
| F-P-GAPDH 341     | GATGGTGAAGGTCGGAGTG                   | qRT-PCR, pig GAPDH          |
| R-P-GAPDH 579     | GATCTCGCTCCTGGAAGATG                  | qRT-PCR, pig GAPDH          |
| F-P-Occludin 1351 | TCCACCCATCACTTCAGATC                  | qRT-PCR, pig Occludin       |
| R-P-Occludin 1532 | ATTCATCAGCAGCAGCCATG                  | qRT-PCR, pig Occludin       |
| F-P-ZO1a          | ACCAGCCTCTGCTGTTAATCCT                | qRT-PCR, pig ZO1a           |
| R-P-ZO1a          | GCTCTTGGTCTCTGGGCACT                  | qRT-PCR, pig ZO1a           |
| F-P-VE 691        | GTGCCCATGTACAAGATCG                   | qRT-PCR, pig VE-C           |
| R-P-VE 889        | CTGGGTCCTTGACAAACAG                   | qRT-PCR, pig VE-C           |
| F-P-Claudin5 289  | GTGCAAGGTGTACGACTCGG                  | qRT-PCR, pig Claudin 5      |
| R-P-Claudin5 542  | AGAACTCGCGGACCACGATG                  | qRT-PCR, pig Claudin 5      |

38 **Table S2.** HEV RNA loads (log<sub>10</sub> per mL or per gram of tissue) in various samples from pigs  
 39 experimentally-infected with the membrane-associated quasi-enveloped eUS2 virus and the non-  
 40 enveloped US2 virus  
 41

| Group   | Pig no. | Serum |     |     |     | Feces |     |     |     |     |     | Bile | CSF |     | Spinal cord | Brain |
|---------|---------|-------|-----|-----|-----|-------|-----|-----|-----|-----|-----|------|-----|-----|-------------|-------|
|         |         | 0 dpi | 7   | 14  | 21  | 0     | 3   | 7   | 10  | 14  | 21  | 21   | 3   | 21  | 21          | 21    |
| Control | 8       | 0     | 0   | 0   | 0   | 0     | 0   | 0   | 0   | 0   | 0   | 0    | 0   | 0   | 0           | 0     |
|         | 9       | 0     | 0   | 0   | 0   | 0     | 0   | 0   | 0   | 0   | 0   | 0    | 0   | 0   | 0           | 0     |
|         | 10      | 0     | 0   | 0   | 0   | 0     | 0   | 0   | 0   | 0   | 0   | 0    | 0   | 0   | 0           | 0     |
|         | 11      | 0     | 0   | 0   | 0   | 0     | 0   | 0   | 0   | 0   | 0   | 0    | 0   | 0   | 0           | 0     |
|         | 12      | 0     | 0   | 0   | 0   | 0     | 0   | 0   | 0   | 0   | 0   | 0    | 0   | 0   | 0           | 0     |
|         | 13      | 0     | 0   | 0   | 0   | 0     | 0   | 0   | 0   | 0   | 0   | 0    | 0   | 0   | 0           | 0     |
|         | 14      | 0     | 0   | 0   | 0   | 0     | 0   | 0   | 0   | 0   | 0   | 0    | 0   | 0   | 0           | 0     |
| eUS2    | 21      | 0     | 0   | 0   | 0   | 0     | 0   | 6   | 6.5 | 6.5 | 0   | 3.7  | 0   | 0   | 0           | 0     |
|         | 22      | 0     | 0   | 3.8 | 0   | 0     | 0   | 5.9 | 7.1 | 7.7 | 5.7 | 5.8  | 0   | 0   | 0           | 4.3   |
|         | 23      | 0     | 0   | 0   | 0   | 0     | 0   | 5.4 | 7.2 | 6.3 | 0   | 0    | 0   | 0   | 0           | 0     |
|         | 24      | 0     | 0   | 0   | 0   | 0     | 0   | 5.8 | 6.7 | 6   | 0   | 4.6  | 0   | 0   | 0           | 0     |
|         | 25      | 0     | 0   | 0   | 0   | 0     | 0   | 5.1 | 5.4 | 5   | 0   | 0    | 0   | 0   | 0           | 0     |
|         | 51      | 0     | 0   | 0   | 0   | 0     | 0   | 5.8 | 6.4 | 5   | 0   | 0    | 0   | 0   | 0           | 0     |
|         | 52      | 0     | 0   | 0   | 0   | 0     | 5.7 | 6.2 | 6.6 | 6.7 | 0   | 0    | 0   | 0   | 0           | 0     |
| US2     | 1       | 0     | 3.3 | 0   | 0   | 0     | 6.8 | 7.5 | 6.9 | 6.2 | 6.4 | 6.8  | 0   | 0   | 4.9         | 5.0   |
|         | 2       | 0     | 3.5 | 5   | 4.6 | 0     | 6.3 | 7.1 | 6   | 8.4 | 8.5 | 8.8  | 0   | 4.4 | 0           | 5.2   |
|         | 3       | 0     | 0   | 4.9 | 0   | 0     | 5.2 | 7.9 | 8.4 | 8   | 7.7 | 8.5  | 0   | 0   | 0           | 0     |
|         | 4       | 0     | 0   | 4.9 | 5.6 | 0     | 6.4 | 7.5 | 8.1 | 9.1 | 9.4 | 8.8  | 0   | 0   | 0           | 0     |
|         | 5       | 0     | 0   | 4.8 | 4.8 | 0     | 6.6 | 7.4 | 8.4 | 8.8 | 9.2 | 9.4  | 0   | 0   | 0           | 5.1   |
|         | 6       | 0     | 0   | 4.1 | 0   | 0     | 6.5 | 6.1 | 6.6 | 7.9 | 6.3 | 4.9  | 0   | 0   | 0           | 0     |
|         | 7       | 0     | 0   | 0   | 0   | 0     | 6.8 | 7.9 | 8.4 | 6.7 | 7.3 | 0    | 0   | 0   | 0           | 0     |

42
